1  
2  
3  
4  
5  
6  
7  
8  
9  
10  
11  
12  
13  
14  
15

**Songbirds can learn flexible contextual control over syllable sequencing**

Lena Veit<sup>1,2\*</sup>, Lucas Y Tian<sup>1,3</sup>, Christian J Monroy Hernandez<sup>1</sup>, Michael S Brainard<sup>1\*</sup>

<sup>1</sup>Center for Integrative Neuroscience, University of California, San Francisco, USA and  
Howard Hughes Medical Institute

<sup>2</sup>Current address: Institute for Neurobiology, University of Tübingen, Germany

<sup>3</sup>Current address: The Rockefeller University, New York, NY, USA

\*Correspondence should be addressed: [lana.veit@uni-tuebingen.de](mailto:lana.veit@uni-tuebingen.de), [msb@phy.ucsf.edu](mailto:msb@phy.ucsf.edu)

16 **Abstract**

17

18 The flexible control of sequential behavior is a fundamental aspect of speech, enabling endless  
19 reordering of a limited set of learned vocal elements (i.e. syllables or words). Songbirds are  
20 phylogenetically distant from humans, but share the capacity for vocal learning as well as neural  
21 circuitry for vocal control that includes direct cortical-brainstem projections. Based on these  
22 similarities, we hypothesized that songbirds might likewise be able to learn flexible, moment-  
23 by-moment control over vocal production. Here, we demonstrate that Bengalese finches, which  
24 sing variable syllable sequences, can learn to rapidly modify the probability of specific  
25 sequences (e.g. ‘ab-c’ versus ‘ab-d’) in response to arbitrary visual cues. Moreover, once  
26 learned, this modulation of sequencing occurs immediately following changes in contextual  
27 cues and persists in the absence of external reinforcement. Our findings reveal a capacity in  
28 songbirds for learned contextual control over syllable sequencing that parallels aspects of  
29 human cognitive control over speech.

## 30 **Introduction**

31 A crucial aspect in the evolution of human speech is thought to be the development of flexible  
32 control over learned vocalizations (Ackermann, Hage, & Ziegler, 2014; Belyk & Brown, 2017).  
33 Humans have unparalleled control over their vocal output, with a capacity to reorder a limited  
34 number of learned elements to produce an endless combination of vocal sequences that are  
35 appropriate for current contextual demands. This flexibility ingrained in human language stands  
36 in striking contrast to the largely innate and stereotypic vocalization patterns of most animal  
37 species, including our closest relatives, the non-human primates. One recent hypothesis posits  
38 that a marked elaboration of the direct innervation of brainstem and midbrain vocal networks  
39 by executive control structures in the frontal cortex underpins the human ability for flexible  
40 vocal control (Hage & Nieder, 2016; Simonyan & Horwitz, 2011). However, the evolutionary  
41 and neural circuit mechanisms that have enabled the development of this remarkable  
42 functionality remain poorly understood.

43  
44 Songbirds are phylogenetically distant from humans, but they have proven a powerful model  
45 for investigating neural mechanisms underlying learned vocal behavior. Song learning exhibits  
46 many parallels to human speech learning; in particular, juveniles need to hear an adult tutor  
47 during a sensitive period, followed by a period of highly variable sensory-motor exploration  
48 and practice, during which auditory feedback is used to arrive at a precise imitation of the tutor  
49 song (Brainard & Doupe, 2002). This capacity for vocal learning is subserved by a well-  
50 understood network of telencephalic song control nuclei. Moreover, as in humans, this vocal  
51 control network includes strong projections directly from cortical (pallial) to brainstem vocal  
52 control centers (Doupe & Kuhl, 1999; Simonyan & Horwitz, 2011). These shared behavioral  
53 features and neural specializations led us to consider whether birds might also share the human  
54 capacity to learn flexible control of syllable sequencing.

55

56 In spite of the similarities between speech and birdsong, song has largely been seen as an  
57 affective behavior, elicited instinctually by contact with potential mates, rivals, or performed  
58 spontaneously (Doupe & Kuhl, 1999; Nieder & Mooney, 2020; T. N. Suzuki, Wheatcroft, &  
59 Griesser, 2020). There are differences between songs produced in distinct social contexts, such  
60 as courtship or territorial defense, and these can include alteration to the sequencing of syllables  
61 (Chen, Matheson, & Sakata, 2016; Sakata, Hampton, & Brainard, 2008; Searcy & Beecher,  
62 2009). However, these social influences likely reflect a general modulation of song structure  
63 related to the animal's affective state (Berwick, Okanoya, Beckers, & Bolhuis, 2011), and do  
64 not reveal whether song can be modified more flexibly by different cognitive factors.

65

66 Here, we test whether songbirds, like humans, can learn to flexibly control vocal sequences,  
67 independently of social or other natural contexts. We specifically asked whether Bengalese  
68 finches (*Lonchura striata*) could learn to alter the sequencing of learned song elements in  
69 response to arbitrarily chosen visual cues. Each Bengalese finch song consists of ~5-12  
70 acoustically distinct elements ('syllables') that are sung in variable but non-random order  
71 (Okanoya, 2004; Warren, Charlesworth, Tumer, & Brainard, 2012). For a given bird, the  
72 relative probabilities of specific transitions between syllables normally remain constant over  
73 time, but previous work has shown that birds can gradually adjust those probabilities in  
74 response to training that reinforces the production of some sequences over others. In this case,  
75 changes to syllable sequencing develop over a period of hours to days (Warren et al., 2012). In  
76 contrast, we investigate here whether birds can learn to change syllable sequencing on a  
77 moment-by-moment basis in response to arbitrary visual cues that signal which sequences are  
78 adaptive at any given time. Our data reveal an unexpected capacity of birds to immediately,  
79 flexibly, and adaptively adjust their sequencing of vocal elements in response to learned  
80 contextual cues, in a manner that parallels key aspects of human cognitive control over speech.

81

## 82 **Results**

83

### 84 **Bengalese finches can learn context-dependent syllable sequencing**

85 For each bird in the study, we first identified variably produced syllable sequences that could  
86 be gradually modified using a previously described aversive reinforcement protocol (Tumer &  
87 Brainard, 2007; Warren et al., 2012). For example, a bird that normally transitioned from the  
88 fixed syllable sequence ‘ab’ to either a ‘c’ or a ‘d’ (**Figures 1A,B**, sequence probability of ~36%  
89 for ‘ab-c’ and ~64% for ‘ab-d’), was exposed to a aversive white noise (WN) feedback delivered  
90 immediately after the “target sequence” ‘ab-d’ was sung. In response, the bird learned over a  
91 period of days to gradually decrease the relative probability of that sequence in favor of the  
92 alternative sequence ‘ab-c’ (**Fig. 1C**). This change in sequence probabilities was adaptive in  
93 that it enabled the bird to escape from WN feedback. Likewise, when the alternative syllable  
94 sequence, ‘ab-c’, was the target sequence, the bird gradually increased the probability of the  
95 alternate sequence ‘ab-d’ over several days of training (**Fig. 1D**). These examples are consistent  
96 with prior work that showed such sequence modifications develop over a period of several days,  
97 with the slow time course suggesting a gradual updating of synaptic connections within syllable  
98 control networks in response to performance-related feedback (Warren et al., 2012). In contrast,  
99 the ability to immediately and flexibly reorder vocal elements in speech must reflect  
100 mechanisms that enable contextual factors to exert moment-by-moment control over selection  
101 and sequencing of alternative vocal motor programs. Having identified sequences for each bird  
102 for which the probability of production could be gradually modified in this manner, we then  
103 tested whether birds could be trained to rapidly switch between those same sequences in a  
104 context-dependent manner

105

106 To determine whether Bengalese finches can also learn to flexibly select specific syllable  
107 sequences on a moment-by-moment basis, we paired WN targeting of specific sequences with

108 distinct contextual cues. In this context-dependent training protocol, WN was targeted to  
109 defined sequences in the bird's song as before, but the specific target sequence varied across  
110 alternating blocks, signaled by different colored lights in the home cage. **Figure 1E** shows an  
111 example, with 'ab-d' targeted in yellow light, 'ab-c' in green light. Light contexts switched after  
112 random intervals of 1-2.5 hours. At baseline without WN, such light switches did not lead to  
113 significant sequencing changes, indicating that there was no inherent influence of the light  
114 context on sequence probabilities (**Fig. 1F**,  $67\pm 1.6\%$  vs.  $64\pm 1.5\%$ ,  $p = 0.17$ , ranksum test,  
115  $n=53$  context blocks from baseline period). In contrast, significant sequencing differences that  
116 appropriately reduced aversive feedback in each reinforcement context were observed after 2  
117 weeks of training (**Fig. 1G**,  $36.5\pm 4.8\%$  vs.  $83.1\pm 3.5\%$ ,  $p < 0.01$ , ranksum test,  $n=22$  context  
118 blocks). Likewise, for all birds trained on this protocol ( $n = 8$ ) a significant context-dependent  
119 shift in sequence probabilities developed over the period of training ( $1\pm 2\%$  average  
120 difference in probabilities between contexts at baseline increased to  $27\pm 6\%$  after a mean of  
121 33 days training;  $p < 0.01$ ,  $n=8$ , signed rank test, **Fig. 1H**). Thus, Bengalese finches are able to  
122 learn context-specific modifications to their syllable sequences.

123

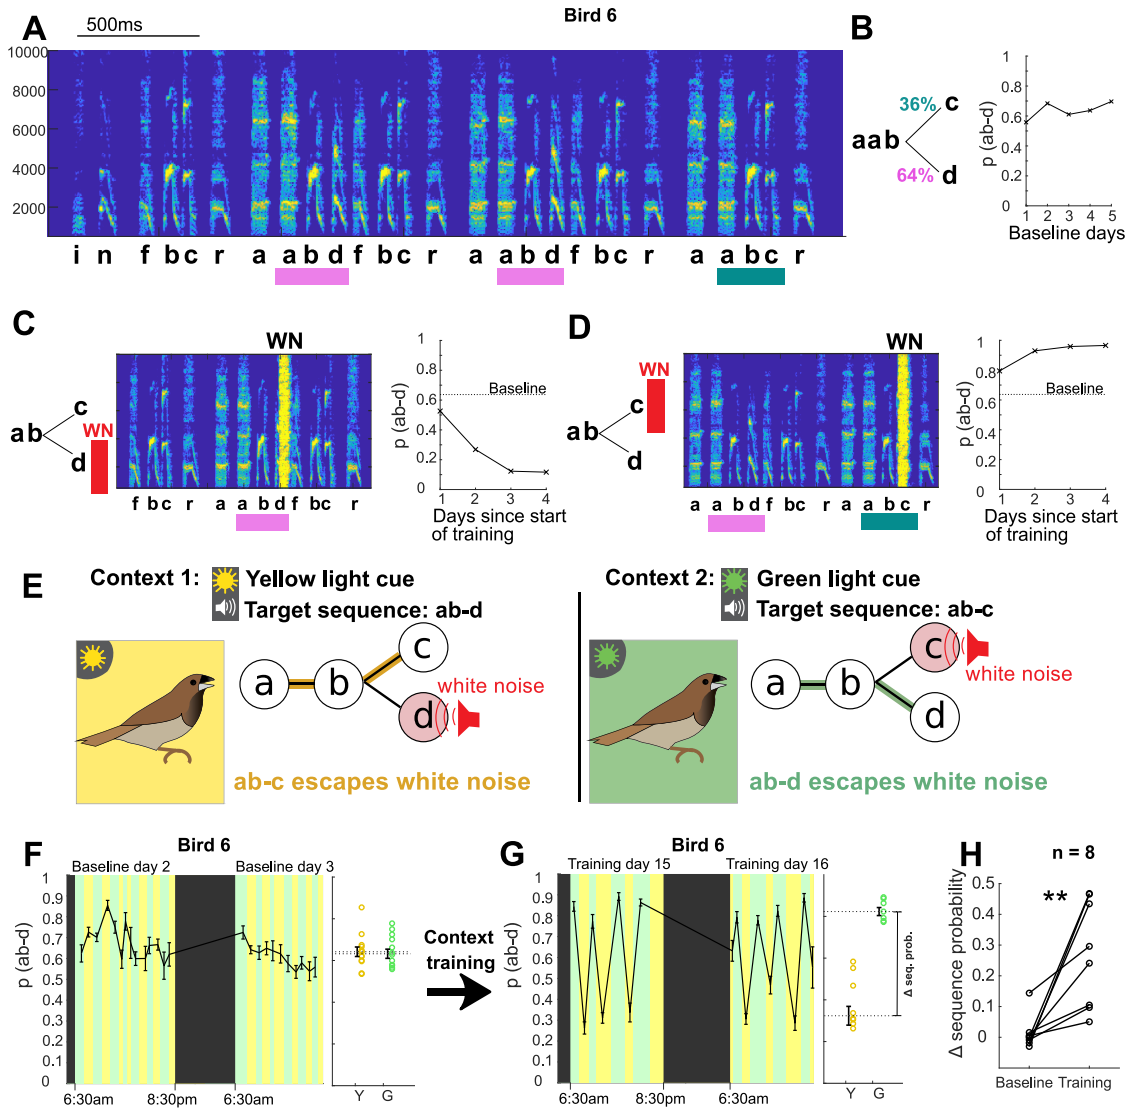

124

125 **Figure 1. Bengalese finches can learn context-dependent sequencing**

126 **A:** Example spectrogram highlighting points in the song with variable sequencing.  
 127 Individual syllables are labeled based on their spectral structure, and target sequences for  
 128 the different experiments (ab-c and ab-d) are marked with colored bars. Scale for x-axis  
 129 is 500ms and y-axis shows frequency. **B:** Transition diagram with probabilities for the  
 130 sequences ab-c and ab-d. The sequence probability of ab-d (and likewise of the  
 131 complementary probability ab-c) stayed relatively constant over five days of baseline  
 132 song recordings. **C:** Aversive reinforcement training. Schematic showing aversive WN  
 133 after target syllable sequence ab-d is sung; spectrogram shows actual WN stimulus,  
 134 covering part of syllable d. WN targeted to the sequence ab-d led to a gradual reduction  
 135 in the probability of that sequence over several days. **D:** In a subsequent experiment, WN  
 136 targeted to the sequence ab-c led to a gradual increase in the sequence probability of ab-  
 137 d over several days. **E:** Schematic of the contextual learning protocol, where the target for  
 138 WN depends on colored lights. **F:** Left: Two example days of baseline light switches  
 139 without WN with alternating blocks of green and yellow context. Colors indicate light  
 140 context (black indicates periods of lights off during the night), error bars indicate SEM  
 141 across song bouts in each block. Right: Average sequence probability in yellow and green  
 142 blocks during baseline. Open circles show individual blocks of yellow and green context,  
 143 error bars indicate SEM across blocks. **G:** Left: Two example days after training (WN on)  
 144 with alternating blocks of green and yellow context, as in F. Right: Average sequence

145 probability in yellow and green blocks after training, as in F. **H: Contextual difference in**  
146 sequence probability for eight trained birds before and after training.  
147

#### 148 **Syllable sequencing shifts immediately following context switches**

149 Contextual differences between different blocks could arise through an immediate shift in  
150 sequence probabilities upon entry into a new context and/or by rapid learning within each block.  
151 We examined whether trained birds exhibited any immediate adjustments to their syllable  
152 sequencing when entering a new light context by computing the average probability of targeted  
153 sequences across songs aligned by the time of transition between contexts (**Fig. 2A,B**, example  
154 experiment). This “transition-triggered average” of sequence probabilities revealed that across  
155 all birds, transitions to the yellow context were accompanied by an immediate decrease in the  
156 probability of the yellow target sequence, whereas transitions out of the yellow context (and  
157 into the green context) led to an immediate increase in the yellow target sequence (**Fig. 2C,D**,  
158  $p < 0.05$ , signed rank test comparing first and last song,  $n=8$ ). To quantify the size of immediate  
159 shifts, we calculate the difference in sequence probability from the last five songs in the old  
160 context to the first five songs in the new context; this difference was on average  $0.24 \pm 0.06$  for  
161 switches to green light and  $-0.22 \pm 0.06$  for switches to yellow light (**Fig. 2 E,F**). These results  
162 indicate that birds could learn to immediately recall an acquired memory of context-appropriate  
163 sequencing upon entry into each context, even before having the chance to learn from  
164 reinforcing feedback within that context.

165

166 We next asked whether training additionally led to an increased rate of learning within each  
167 context, which also might contribute to increased contextual differences over time. Indeed, such  
168 faster re-learning for consecutive encounters of the same training context, or ‘savings’, is  
169 sometimes observed in contextual motor adaptation experiments (Lee & Schweighofer, 2009).  
170 To compare the magnitude of the immediate shift and the magnitude of within-block learning  
171 over the course of training, we plotted the switch-aligned sequence probabilities at different



172 points in the training process. **Figure 2G** shows for the example bird that the magnitude of the  
173 shift (computed between the first and last five songs across context switches) gradually  
174 increased over 11 days of training. **Figure 2H** shows the switch-aligned sequence probability  
175 trajectories (as in **Fig. 2A,B**) for this bird early in training (red) and late in training (blue),  
176 binned into groups of 7 context switches. Qualitatively, it is apparent for each of the context  
177 switches that there was both an abrupt change in sequence probability at the onset of each block  
178 (immediate shift at time point 0) and a gradual adjustment of sequence probability within each  
179 block (within-block learning over the first 80 songs following light switch). Over the course of  
180 training, the switch-aligned trajectories shifted approximately in parallel, indicating that the  
181 immediate shift at the start of the new context got larger, while the gradual change within blocks  
182 stayed approximately the same. Linear fits to the sequence probabilities for each trajectory (over  
183 the first 80 songs following light switch) reveal that, indeed, the change in sequence probability  
184 at the onset of blocks (i.e. intercepts) increased over the training process (**Fig. 2K**), while the  
185 change within block (i.e. slopes) stayed constant (**Fig. 2I**). To quantify this across birds we  
186 measured the change over the course of learning in both the magnitude of immediate shifts  
187 (estimated as the intercepts from linear fits) and the rate of within-block learning (estimated as  
188 the slopes from linear fits). Similar to the example bird, we found that the rate of learning within  
189 each block stayed constant over time for all five birds (**Fig. 2L**). In contrast, the magnitude of  
190 immediate shifts grew over time in all birds (**Fig. 2L**). This indicates that adjustments to  
191 sequence probability are due to two dissociable processes, a gradual adaptation of sequence  
192 probability within each block of WN, which is not modified by increased contextual training,  
193 and an immediate shift in sequence probability at the beginning of blocks, which is sensitive to  
194 contextual cues and increases with contextual training.

195

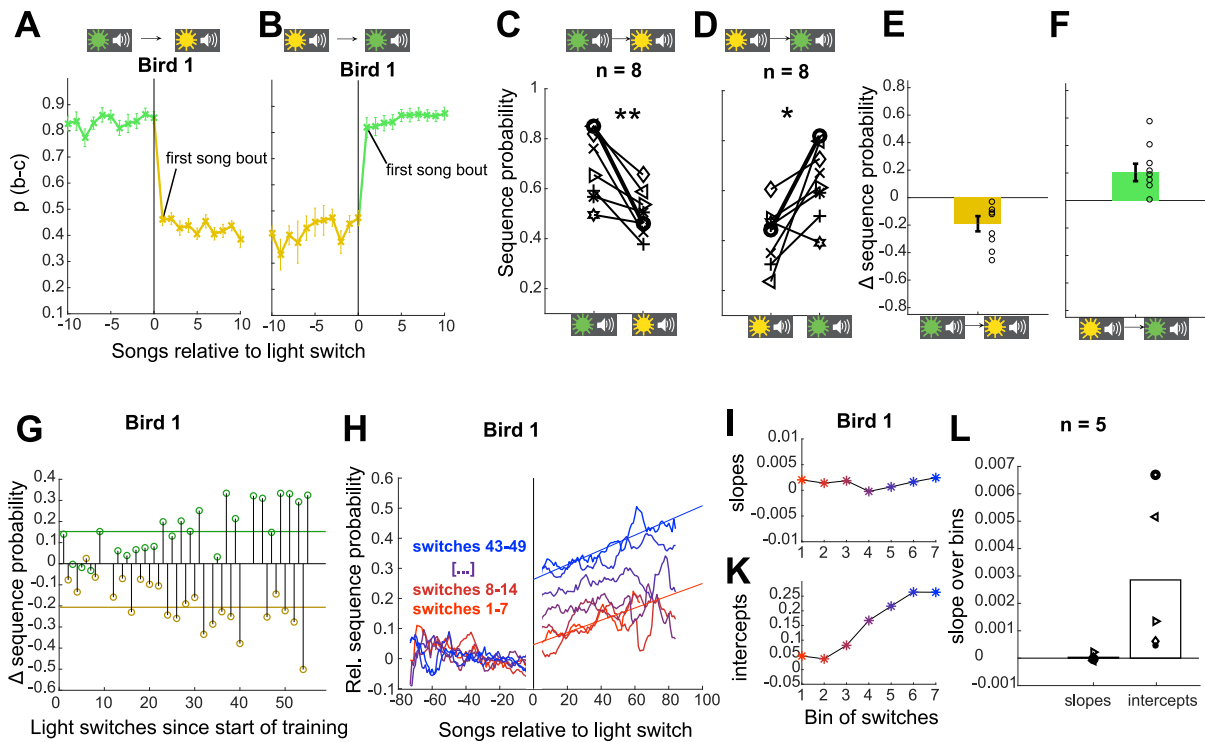

196

197 **Figure 2. Sequence probabilities can be shifted immediately following a change in**  
 198 **context.**

199 **A-B:** Sequence probability for example Bird 1 over time, switching from green to yellow  
 200 context (A) and switching from yellow to green context (B). Error bars indicate SEM  
 201 across song bouts (n = 35 switches (A), n = 33 switches (B)). **C:** Change in sequence  
 202 probability from the last song in green context to the first song in yellow context for all  
 203 8 birds. Example bird in A-B highlighted in bold. **D:** Change in sequence probability from  
 204 the last song in yellow context to the first song in green context. **E:** Shift magnitude for all  
 205 birds, defined as the change in sequence probability from the last five songs in the green  
 206 context to the first five songs in the yellow context. Open circles show individual birds,  
 207 error bars indicate SEM across birds. **F:** Same as E for switches from yellow to green. **G:**  
 208 Shift magnitude over training time for the example bird (11 days and 49 context switches;  
 209 seven of the original 56 context switches are excluded from calculations of shift  
 210 magnitudes because at least one of the involved blocks contained only one or two song  
 211 bouts.). **H:** Trajectory of switch-aligned sequence probabilities for the example bird early  
 212 in training (red) and late in training (blue). Probabilities are normalized by the sequence  
 213 probability in preceding block, and plotted so that the adaptive direction is positive for  
 214 both switch directions (i.e. inverting the probabilities in yellow switches.) **I:** Slope of fits  
 215 to the sequence probability trajectories over song bouts within block. Units in change of  
 216 relative sequence probability per song bout. **K:** Intercept of fits to sequence probability  
 217 trajectories over song bouts within block. Units in relative sequence probability. **L:**  
 218 Change in slope and change in intercept for five birds over the training process,  
 219 determined as the slope of a linear fit to the curves in I,K.  
 220

221 **Visual cues in the absence of reinforcement are sufficient to evoke sequencing changes**

222 The ability of Bengalese finches to implement an immediate shift in sequencing on the first  
 223 rendition in a block – and thus before they have a chance to learn from reinforcing feedback –

224 argues that they can maintain context-specific motor memories and use contextual visual cues  
225 to anticipate correct sequencing in each context. To explicitly test whether birds can flexibly  
226 switch between behaviors appropriate for distinct contexts using solely visual cues, we included  
227 short probe blocks which presented the same light colors without WN stimulation. Probe blocks  
228 were interspersed in the sequence of training blocks so that each transition between types of  
229 blocks was possible and, on average, every third transition was into a probe block (see Methods,  
230 10 of 34 blocks in sequence). Light switches into probe blocks were associated with similar  
231 magnitude shifts in sequence probability as switches into WN blocks of the corresponding color  
232 (-0.22 +/- 0.06 to both yellow WN and yellow probe blocks from green WN blocks,  $p = 0.94$ ,  
233 signed rank test; 0.24 +/- 0.06 to green WN and 0.23 +/- 0.07 to green probe blocks from yellow  
234 WN blocks,  $p = 0.64$ , signed rank test). As the most direct test of evoked sequencing changes  
235 with light cues alone, we compared transitions directly between probe blocks without  
236 intervening WN training blocks (probe-probe transitions). The sequence of context blocks  
237 included direct probe-probe transitions approximately every 17 transitions. **Figure 3A,B** shows  
238 song bouts for one example bird (Bird 2) which were sung consecutively across a context switch  
239 from yellow probe to green probe. In this case, immediately following the switch from the  
240 yellow context to the green context, the yellow target sequence ('fab') was more prevalent, and  
241 the green target sequence ('nab') was less prevalent. Consistent with this example, this bird  
242 exhibited appropriate shifts in syllable sequencing when changing directly between probe  
243 blocks in the absence of any WN (**Fig. 3C,D**), demonstrating that the arbitrary visual cues alone  
244 had become sufficient to induce an immediate shift in sequence probabilities. Likewise, all eight  
245 birds showed appropriate shifts in sequencing for the first song in the new context compared to  
246 the old context (**Fig. 3E,F**,  $p < 0.05$  signed rank test,  $n=8$ ), with average shift magnitude -  
247 0.21 +/- 0.09 and 0.17 +/- 0.08 (**Fig. 3G,H**), confirming that they can indeed maintain context-  
248 specific sequencing shifts for consecutive unreinforced switches without immediate experience

249 of white noise. Therefore, visual cues alone were sufficient to act as cues for anticipatory shifts  
 250 between learned context-dependent syllable sequences.  
 251

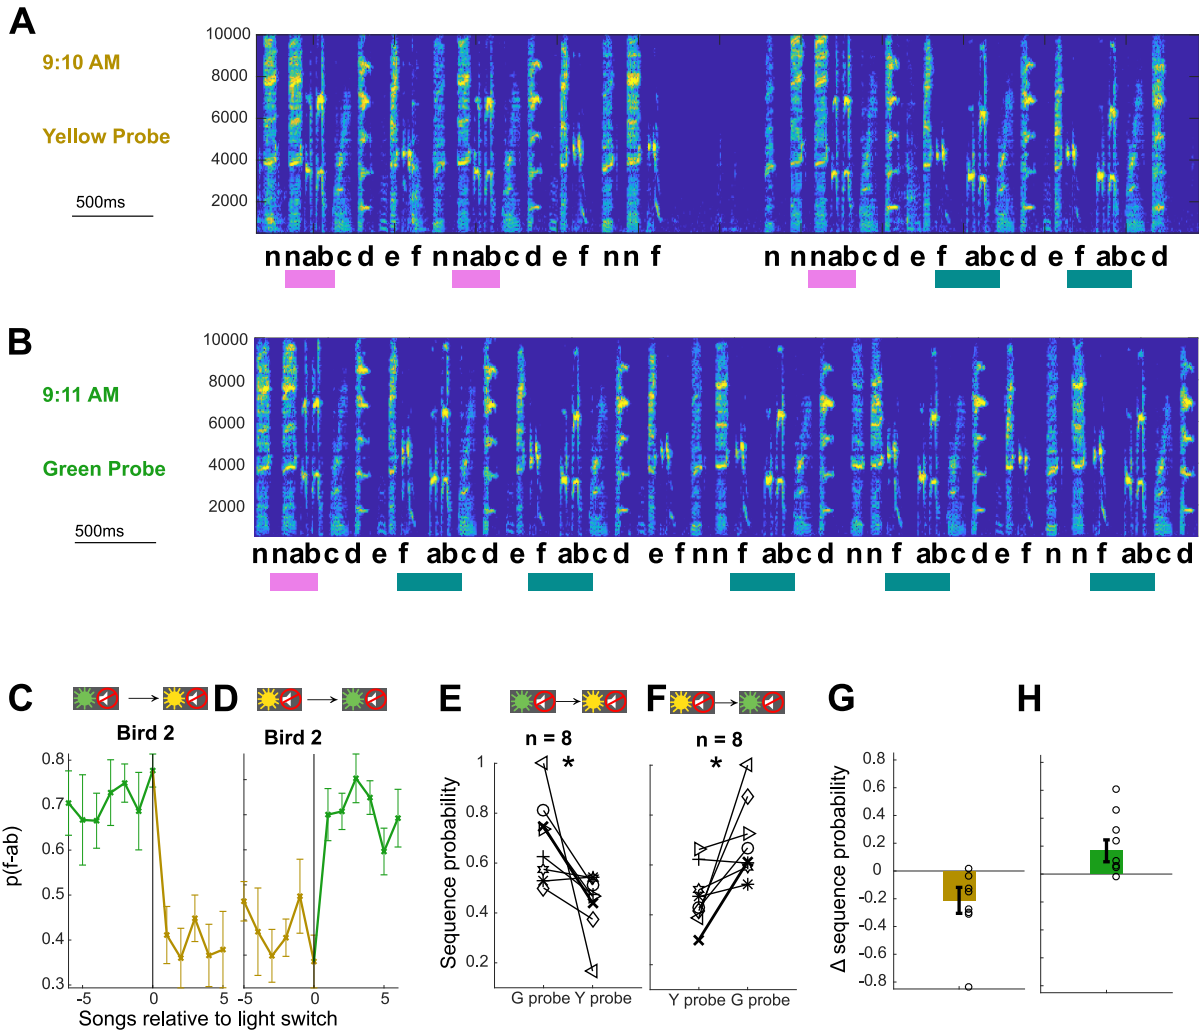

252

253 **Figure 3. Contextual cues alone are sufficient to enable fast changes to syllable**  
 254 **sequencing.**

255 **A:** Example last song spectrogram in yellow probe context for Bird 2. Scale for x-axis is  
 256 500ms, y-axis shows frequency. **B:** Example first song spectrogram in green probe context  
 257 for Bird 2, sung less than one minute after the song in A. **C,D:** Sequence probability for  
 258 example Bird 2 over time, switching from green probe to yellow probe context (C) and  
 259 switching from yellow probe to green probe context (D). Error bars indicate SEM across  
 260 song bouts ( $n = 14$  switches (C), 11 switches (D)). The display is cut off at the point where  
 261 less than half of the curves were still contributing data (i.e. in D, the median number of song  
 262 bouts after the switch is 6).

263 **E,F:** Sequence probability changes for all eight birds at the transition from the last song in  
 264 green probe contexts to the first song in yellow probe contexts, and vice versa. Example  
 265 bird in A-D highlighted in bold. **G,H:** Shift magnitude for direct probe-probe transitions  
 266 for all birds. Open circles show individual birds, error bars indicate SEM across birds.  
 267

268 **Distinct sequence probabilities are specifically associated with different visual cues**

269 The ability to adjust behavior in response to switches between two contexts could potentially  
270 depend on a simplified strategy of learning two different motor states and switching between  
271 them in response to a detected light switch, independent of the particular colors being switched.  
272 In order to test whether birds were using such a strategy or indeed learning specific associations  
273 between particular visual cues and particular syllable sequencing states, in a subset of birds we  
274 recorded switches between three different color-sequencing pairings. After the conclusion of  
275 the other experiments, we introduced blocks of unreinforced context (white light), interleaved  
276 with the two previously trained colored contexts. In an example bird (**Fig. 4A**), switching from  
277 the unreinforced context elicited changes in opposite directions for the two different light  
278 colors. This was true both for switches into WN blocks and into probe blocks (**Fig. 4A**). All  
279 birds ( $n = 3$ ) showed adaptive sequencing changes for the first song bout in probe blocks  
280 (**Fig. 4B,C**) as well as fast shifts in the adaptive directions for all color contexts (**Fig. 4D**  $0.11 \pm$   
281  $0.04$  and  $0.19 \pm 0.05$  for switches to green WN and green probe blocks, respectively;  $-0.15 \pm$   
282  $0.06$  and  $-0.09 \pm 0.02$  for switches to yellow WN and yellow probe blocks, respectively). This  
283 indicates that birds can indeed maintain at least two different trained sequencing states separate  
284 from a 'neutral' state, and use specific pairings between colored cues and sequencing states to  
285 adjust behavior in distinct directions adaptive for each context.

286

287

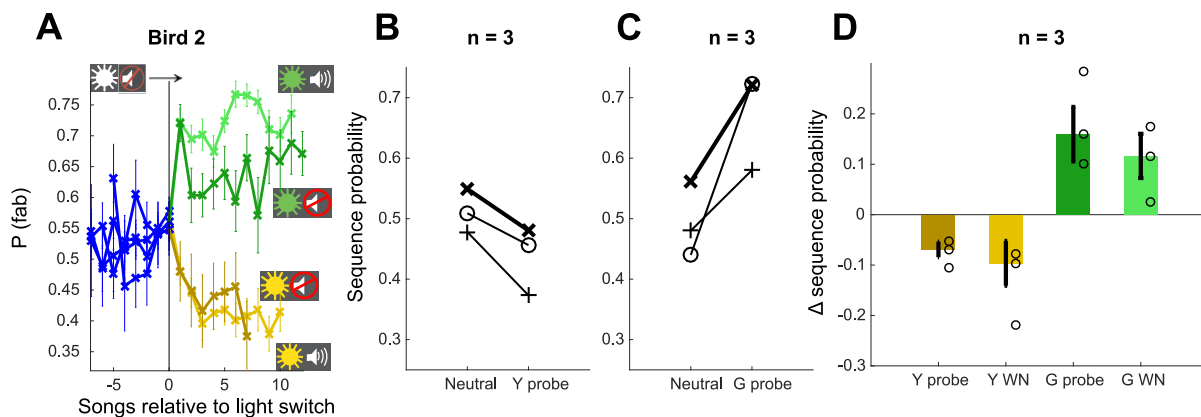

288  
289

## 290 **Figure 4. Contextual cues allow shifts in both directions**

291 **A:** Sequence probability for Bird 2 at the transition from neutral context to yellow and  
292 green WN contexts, as well as yellow and green probe contexts. Error bars indicate SEM  
293 across song bouts (n = 68 switches (green WN), 78 switches (yellow WN), 27 switches  
294 (green probe), 24 switches (yellow probe)). **B,C:** Sequence probabilities for three birds  
295 for the last song in neutral context and the first song in the following probe context.  
296 Example bird in I highlighted in bold. **D:** Shift magnitude for three birds at the transition  
297 from neutral context to all other contexts. Open circles show individual birds, error bars  
298 indicate SEM.  
299

## 300 **Discussion**

301

302 Speech, thought, and many other behaviors are composed of ordered sequences of simpler  
303 elements. The flexible control of sequencing is thus a fundamental aspect of cognition and  
304 motor function in health and disease (Aldridge & Berridge, 2002; X. Jin & Costa, 2015; Tanji,  
305 2001). While the flexibility of communication in human speech is unparalleled, our contextual  
306 training paradigm revealed a striking capacity in birds to produce distinct vocal sequences in  
307 response to arbitrary cues. Hence, for song, like speech, the ordering of vocal elements can be  
308 rapidly reconfigured to achieve contextually appropriate goals. This shared capacity for  
309 moment-by-moment control of vocal sequencing in humans and songbirds suggests that the  
310 avian song system could be an excellent model for investigating how neural circuits enable  
311 flexible and adaptive reconfiguration of motor output in response to different cognitive  
312 demands.

313

314 *Flexible control of vocalizations*

315 Our finding that Bengalese finches can learn to exert contextual control over the ordering of  
316 vocal elements builds on previous work showing that a variety of animals can learn to emit or  
317 withhold innate vocalizations in response to environmental or experimentally imposed cues.  
318 For example, non-human primates and other animals can produce alarm calls that are innate in  
319 their acoustic structure, but that are deployed in a contextually appropriate fashion (Nieder &  
320 Mooney, 2020; T. N. Suzuki & Zuberbühler, 2019; Wheeler & Fischer, 2012). Similarly,  
321 animals, including birds, can be trained to exert contextual control over their vocalizations in  
322 an experimental setting, by reinforcing the production of innate vocalizations in response to  
323 arbitrary cues to obtain food or water rewards (Brecht, Hage, Gavrilov, & Nieder, 2019; Hage  
324 & Nieder, 2013; Nieder & Mooney, 2020; Reichmuth & Casey, 2014). In relation to these prior  
325 findings, our results demonstrate a particularly sophisticated capacity to flexibly reorganize the  
326 sequencing of learned vocal elements, rather than select from a fixed set of innate vocalizations,  
327 in response to arbitrary cues. This ability to contextually control the ordering, or syntax, of  
328 specifically targeted syllable transitions within the overall structure of learned song is striking  
329 in its parallel to the human capacity to differentially sequence a fixed set of syllables to create  
330 distinct meanings.

331

332 The ability to alter syllable sequencing in a flexible fashion also contrasts with prior studies that  
333 have demonstrated modulation of vocalizations in more naturalistic settings. For example,  
334 songs produced in the context of courtship and territorial or aggressive encounters (“directed  
335 song”) differ in acoustic structure from songs produced in isolation (“undirected song”). This  
336 modulation of song structure by social context is characterized by global changes to the  
337 intensity of song production, with directed songs exhibiting greater tempo and greater  
338 stereotypy of both syllable structure and syllable sequencing than undirected songs (Hedley,

339 Denton, & Weiss, 2017; Sakata et al., 2008; Searcy & Beecher, 2009). Moreover, the  
340 modulation of song and other simpler vocalizations in natural settings may be largely innate  
341 and affective in nature, with influences of conspecific signaling potentially hardwired via  
342 hypothalamic and neuromodulatory inputs to premotor regions (Berwick et al., 2011; Gadagkar,  
343 Puzerey, & Goldberg, 2019; James, Dai, & Sakata, 2018; Nieder & Mooney, 2020; Wheeler &  
344 Fischer, 2012). In contrast, here we show that birds can learn to locally modulate specific  
345 features of their songs (i.e. individually targeted syllable transitions) in response to arbitrarily  
346 assigned contextual stimuli that have no prior ethological relevance.

347

#### 348 *Evolution of control over vocal sequencing*

349 While birds are phylogenetically distant from humans, our results raise the question of whether  
350 similar evolutionary forces may have led to a shared capacity for flexible control of vocal  
351 sequencing, and whether such forces might have contributed to the eventual development of  
352 human speech and language. The capacity for moment-by-moment adjustment of vocalizations  
353 may have developed in part to enable the customization of vocal signatures for purposes of  
354 individual and group recognition (Vignal, Mathevon, & Mottin, 2004), to enhance  
355 communication, or to avoid overlap or ‘jamming’ during vocal turn-taking and in response to  
356 environmental noises (Benichov & Vallentin, 2020; Brumm & Zollinger, 2013). Such  
357 ethologically relevant capacities for vocal control likely reflect evolutionary advantages of  
358 incorporating sensory and contextual information about conspecifics and the environment in  
359 generating increasingly sophisticated vocal signaling. Our results indicate a latent capacity to  
360 integrate arbitrary sensory signals into the adaptive deployment of vocalizations in songbirds.  
361 Perhaps evolutionary pressures to develop more nuanced social communication led to an  
362 elaboration of cortical control over vocalizations in both songbirds and humans, establishing a  
363 conduit that facilitated the integration of progressively more abstract cues and internal states in



364 that control. The avian song system provides an ideal opportunity to investigate  
365 mechanistically how such top-down pathways orchestrate the flexible control of vocalizations.

366

367 *Neural implementation of context-dependent motor sequencing*

368 The ability of birds to switch between distinct motor programs using visual cues is reminiscent  
369 of contextual motor control in humans, where subjects can learn two separate states of motor  
370 adaptation, and switch between them using contextual cues or other cognitive strategies  
371 (Cunningham & Welch, 1994). Models of such context-dependent motor adaptation frequently  
372 assume at least two parallel processes (Abrahamse, Ruitenberg, De Kleine, & Verwey, 2013;  
373 Ashe, Lungu, Basford, & Lu, 2006; Hikosaka et al., 1999; Lee & Schweighofer, 2009;  
374 McDougale, Ivry, & Taylor, 2016; Wolpert, Diedrichsen, & Flanagan, 2011). One is more  
375 flexible, and sensitive to contextual information (McDougale et al., 2016), while a slower  
376 process, related to basic motor adaptation, might not be easily associated with arbitrary cues  
377 (Howard, Wolpert, & Franklin, 2013). Specifically, in a test of one two-process model,  
378 Imamizu and colleagues (Imamizu & Kawato, 2009; Imamizu et al., 2007) found that contextual  
379 information can be used for rapid adaptation at the beginning of new blocks, without affecting  
380 the rate of adaptation within blocks. In striking parallel to these results in a human motor  
381 adaptation study, our analysis of the progression of learning (**Fig. 2 G-L**) reveals two separate  
382 processes: fast context-dependent shifts in sequence probability, which increased over the  
383 course of training, and gradual adaptation within blocks, which did not change over training.  
384 For humans, the slow processes are thought to rely on primary motor structures, while fast  
385 context-dependent adaptation has been associated with activation of prefrontal and parietal  
386 association areas (Imamizu & Kawato, 2009). In songbirds, the gradual adaptation of sequence  
387 probabilities within blocks might likewise be controlled by motor and premotor song control  
388 structures, while visual contextual cues might be processed in avian structures analogous to  
389 mammalian prefrontal cortex outside the song system. For example, the association area

390 nidopallium caudolaterale (Güntürkün, 2005), is activated by arbitrary visual cues that encode  
391 learned rules (Veit & Nieder, 2013; Veit, Pidpruzhnykova, & Nieder, 2015), and this or other  
392 avian association areas (Jarvis et al., 2013) may serve as an intermediate representation of the  
393 arbitrary contextual cues that drive rapid contextual shifts.

394

395 At the level of song motor control, our results indicate a greater capacity for rapid and flexible  
396 adjustment of syllable transition probabilities than previously appreciated. Current models for  
397 song production include networks of neurons in the vocal premotor nucleus HVC responsible  
398 for the temporal control of individual syllables, which are linked together by activity in a  
399 recurrent loop through brainstem vocal centers (Andalman, Foerster, & Fee, 2011; Ashmore,  
400 Wild, & Schmidt, 2005; Cohen et al., 2020; Hamaguchi, Tanaka, & Mooney, 2016). At branch  
401 points in songs with variable syllable sequencing, one influential model posits that which  
402 syllable follows a branch point is determined by stochastic processes that depend on the strength  
403 of the connections between alternative syllable production networks, and dynamics local to  
404 HVC (D. Z. Jin, 2009; D. Z. Jin & Kozhevnikov, 2011; Troyer, Brainard, & Bouchard, 2017;  
405 Zhang, Wittenbach, Jin, & Kozhevnikov, 2017). Such models could account for a gradual  
406 adjustment of sequence probabilities over a period of hours or days (Warren et al., 2012)  
407 through plasticity of motor control parameters, such as the strength of synaptic connections  
408 within HVC. However, our results demonstrate that there is not a single set of relatively fixed  
409 transition probabilities that undergo gradual adjustments, as could be captured in synaptic  
410 connectivity of branched syllable control networks. Rather, the song system has the capacity to  
411 maintain distinct representations of transition probabilities and can immediately switch between  
412 those in response to visual cues. HVC receives a variety of inputs that could potentially convey  
413 such visual or cognitive influences on sequencing (Bischof & Engelage, 1985; Cynx, 1990;  
414 Seki, Suzuki, Takahasi, & Okanoya, 2008; Ullrich, Norton, & Scharff, 2016; Wild, 1994). One  
415 of these inputs, Nif, has previously been shown to be relevant for sequencing (Hosino &

416 Okanoya, 2000; Vyssotski, Stepien, Keller, & Hahnloser, 2016). It therefore is likely that the  
417 control of syllable sequence in Bengalese finches involves a mix of processes local to HVC  
418 (Basista et al., 2014; Zhang et al., 2017) as well as inputs that convey a variety of sensory  
419 feedback and contextual information. Our behavioral studies pave a way for investigating how  
420 neural circuits enable flexible and adaptive reconfiguration of motor output in response to  
421 different cognitive demands. Together with the quantifiable nature of syllable sequencing and  
422 well-understood neural circuitry of the bird song system, the ability to elicit moment-by-  
423 moment contextual adjustment should provide insight into contextual learning and execution  
424 of skilled motor behavior and the neural underpinnings of cognitive flexibility.

425 **Methods**

426

427 *Subjects & Sound recordings*

428 The experiments were carried out on eight adult Bengalese finches (*Lonchura striata*) obtained  
429 from the lab's breeding colony (age range 128-320 days post hatch, median 178 days, at start  
430 of experiment). Birds were placed in individual sound-attenuating boxes with continuous  
431 monitoring and auditory recording of song. Song was recorded using an omnidirectional  
432 microphone above the cage. We used custom software for the online recognition of target  
433 syllables and real-time delivery of short 40ms bursts of white noise (WN) depending on the  
434 syllable sequence (Tumer & Brainard, 2007; Warren et al., 2012). All procedures were  
435 performed in accordance with animal care protocols approved by the University of California,  
436 San Francisco Institutional Animal Care and Use Committee (IACUC).

437

438 *Training procedure*

439 Bengalese finch song consists of a discrete number of vocal elements, called syllables, that are  
440 separated by periods of silence. At the start of each experiment, a template was generated to  
441 recognize a specific sequence of target syllables for each bird based on their unique spectral  
442 structure. In the context-dependent auditory feedback protocol, the specific sequence of  
443 syllables that received aversive white noise (WN) feedback (the target sequence) switched  
444 between blocks of different light contexts. Colored LEDs (superbrightleds.com, St. Louis, MO;  
445 green 520 nm, amber 600 nm) produced two visually distinct environments (green and yellow)  
446 to serve as contextual cues to indicate which sequences would elicit WN and which would  
447 'escape' (i.e. not trigger WN).

448

449 At the start of each experiment, each color of cage illumination was alternatingly turned on for  
450 a random duration within a range of several minutes to hours (example bird 6: 30-90 min)

451 without WN playback to gather baseline data on sequence probability in the two contexts, in  
452 order to confirm that sequencing changes we observed after training were not just unlearned  
453 responses to the light cues. After gathering baseline data, we started WN training. During initial  
454 training, each color of cage illumination was alternatingly active and then automatically  
455 switched to the other color at a random time within an interval of one to several hours. After  
456 several days of training (average 33), we started including probe blocks in the sequence of block  
457 transitions, to confirm that sequencing changes could be elicited by visual cues alone. Probe  
458 blocks presented the individual light cues without WN. Presentation sequence was set so that  
459 approximately one third of blocks were probe blocks (10/34 blocks) and probes made up on  
460 average between 7-35% of total time. In addition to the eight birds that completed this training  
461 paradigm, three birds were started on training but never progressed to the full probe sequence  
462 either because they did not exhibit single-context learning or because of technical issues with  
463 consistent targeting at branch points; these birds are excluded from the results. In a subset of  
464 experiments, after completing measurements with probe transitions, we added a third, neutral  
465 context (**Fig. 4**), signaled by white light, in which there was no WN reinforcement.

466

#### 467 *Syllable sequence annotation*

468 Syllable annotation for data analysis was performed offline. Each continuous period of singing  
469 that was separated from others by at least two seconds of silence was treated as an individual  
470 song bout. Song was bandpass filtered between 500 Hz and 10000 Hz and segmented into  
471 syllables and gaps based on amplitude threshold and timing parameters determined manually  
472 for each bird. A small sample of songs (approximately 20 song bouts) was then annotated  
473 manually based on visual inspection of spectrograms. These data were used to train an offline  
474 autolabeler ('hybrid-vocal-classifier', (Nicholson, 2016)), which was then used to label the  
475 remaining song bouts. Autolabeled songs were processed further in a semi-automated way  
476 depending on each bird's unique song, for example to separate or merge syllables that were not

477 segmented correctly (detected by their duration distributions), to deal with WN covering  
478 syllables (detected by its amplitude), and to correct autolabeling errors detected based on the  
479 syllable sequence. A subset of songs was inspected manually for each bird to confirm correct  
480 labeling.

481

#### 482 *Sequence probability analyses*

483 Sequence probability was first calculated within each song bout as the frequency of the yellow  
484 target sequence relative to the total number of yellow and green target sequences:

485 
$$p = \frac{n(\text{target}_Y)}{n(\text{target}_Y) + n(\text{target}_G)}$$
. Note that this differs from transition probabilities at branch points

486 in song in that it ignores possible additional syllable transitions at the branch point, and does  
487 not require the targeted sequences to be directly following the same branch point. For example  
488 for the experiment in **Figure 3**, the target sequences were ‘n-ab’ and ‘f-ab’, so the syllable  
489 covered by WN (‘b’ in both contexts) was 2-3 syllables removed from the respective branch  
490 point in the syllable sequence (‘n-f’ vs. ‘n-a’, or ‘f-n’ vs. ‘f-a’). Song bouts that did not contain  
491 either of the two target sequences were discarded. Context switches were then processed to  
492 include only switches between adjacent blocks during the same day, i.e. excluding overnight  
493 switches and treating blocks as separate contexts if one day started with the same color that the  
494 previous day ended. If a bird did not produce any song during one block, this block was merged  
495 with any neighboring block of the same color (for example, green probe without songs before  
496 green WN, where the context switch would not be noticeable for the bird). If the light color  
497 switched twice (or more) without any song bouts, those context switches were discarded.

498

499 In order to reduce variability associated with changes across individual song bouts, shift  
500 magnitude was calculated as the difference between the first five song bouts in the new context  
501 and the last five song bouts in the old context. Only context switches with at least 3 song bouts  
502 in each adjacent block were included in analyses of shift magnitude.

503

504 *Analysis of acquisition*

505 In order to investigate how context-dependent performance developed over training (**Fig. 2 G-**  
506 **L**), we quantified changes to sequence probabilities across block transitions for 5 birds for  
507 which we had a continuous record from the onset of training. Sequence probability curves (e.g.  
508 **Fig. 2 H**) for yellow switches were inverted so that both yellow and green switches were plotted  
509 in the same direction, aligned by the time of context switches, and were cut off at a time point  
510 relative to context switches where fewer than five switches contributed data. We then subtracted  
511 the mean pre-switch value from each sequence probability curve. For visual display of the  
512 example bird, sequence probability curves were smoothed with a 9 bout boxcar window, and  
513 displayed in bins of 7 context switches. To calculate the slope of slopes and slope of intercepts  
514 (**Fig. 3 L**), we calculated a linear fit to the post-switch parts of the unsmoothed sequence  
515 probability curve for each individual context switch.

516

517 **Acknowledgements**

518

519 We thank Alla Karpova, Jon Sakata, Dave Mets, William Mehaffey, Assaf Breska, Guy  
520 Avraham for helpful discussions and comments on earlier versions of this manuscript.

521 Lena Veit has been a Howard Hughes Medical Institute Fellow of the Life Sciences Research  
522 Foundation and was supported by a postdoc fellowship from Leopoldina German National  
523 Academy of Sciences. Christian J Monroy Hernandez was supported by a HHMI EXROP  
524 summer fellowship.

525

526 **Competing interests:**

527 The authors declare no competing interests.

## 528 References

- 529 Abrahamse, E., Ruitenberg, M., De Kleine, E., & Verwey, W. B. (2013). Control of  
530 automated behavior: insights from the discrete sequence production task. *Frontiers*  
531 *in Human Neuroscience*, 7. <http://doi.org/10.3389/fnhum.2013.00082>
- 532 Ackermann, H., Hage, S. R., & Ziegler, W. (2014). Brain mechanisms of acoustic  
533 communication in humans and nonhuman primates: an evolutionary perspective.  
534 *The Behavioral and Brain Sciences*, 37(6), 568–9– discussion 577–604.  
535 <http://doi.org/10.1017/S0140525X13003099>
- 536 Aldridge, J. W., & Berridge, K. C. (2002). Coding of Behavioral Sequences in the Basal  
537 Ganglia. In *The Basal Ganglia VII* (Vol. 52, pp. 53–66). Boston, MA: Springer, Boston,  
538 MA. [http://doi.org/10.1007/978-1-4615-0715-4\\_7](http://doi.org/10.1007/978-1-4615-0715-4_7)
- 539 Andalman, A. S., Foerster, J. N., & Fee, M. S. (2011). Control of vocal and respiratory  
540 patterns in birdsong: dissection of forebrain and brainstem mechanisms using  
541 temperature. *PloS One*, 6(9), e25461. <http://doi.org/10.1371/journal.pone.0025461>
- 542 Ashe, J., Lungu, O. V., Basford, A. T., & Lu, X. (2006). Cortical control of motor sequences.  
543 *Current Opinion in Neurobiology*, 16(2), 213–221.  
544 <http://doi.org/10.1016/j.conb.2006.03.008>
- 545 Ashmore, R. C., Wild, J. M., & Schmidt, M. F. (2005). Brainstem and forebrain  
546 contributions to the generation of learned motor behaviors for song. *The Journal of*  
547 *Neuroscience*, 25(37), 8543–8554. [http://doi.org/10.1523/JNEUROSCI.1668-](http://doi.org/10.1523/JNEUROSCI.1668-05.2005)  
548 05.2005
- 549 Basista, M. J., Elliott, K. C., Wu, W., Hyson, R. L., Bertram, R., & Johnson, F. (2014).  
550 Independent Premotor Encoding of the Sequence and Structure of Birdsong in Avian  
551 Cortex. *The Journal of Neuroscience*, 34(50), 16821–16834.  
552 <http://doi.org/10.1523/JNEUROSCI.1940-14.2014>
- 553 Belyk, M., & Brown, S. (2017). The origins of the vocal brain in humans. *Neuroscience and*  
554 *Biobehavioral Reviews*, 77, 177–193.  
555 <http://doi.org/10.1016/j.neubiorev.2017.03.014>
- 556 Benichov, J. I., & Vallentin, D. (2020). Inhibition within a premotor circuit controls the  
557 timing of vocal turn-taking in zebra finches. *Nature Communications*, 11(1), 1–10.  
558 <http://doi.org/10.1038/s41467-019-13938-0>
- 559 Berwick, R. C., Okanoya, K., Beckers, G. J. L., & Bolhuis, J. J. (2011). Songs to syntax: the  
560 linguistics of birdsong. *Trends in Cognitive Sciences*, 15(3), 113–121.  
561 <http://doi.org/10.1016/j.tics.2011.01.002>
- 562 Bischof, H. J., & Engelage, J. (1985). Flash evoked responses in a song control nucleus of  
563 the zebra finch (*Taeniopygia guttata castanotis*). *Brain Research*, 326(2), 370–374.
- 564 Brainard, M. S., & Doupe, A. J. (2002). What songbirds teach us about learning. *Nature*,  
565 417(6886), 351–358. <http://doi.org/10.1038/417351a>
- 566 Brecht, K. F., Hage, S. R., Gavrillov, N., & Nieder, A. (2019). Volitional control of  
567 vocalizations in corvid songbirds. *PLoS Biology*, 17(8), e3000375.  
568 <http://doi.org/10.1371/journal.pbio.3000375>
- 569 Brumm, H., & Zollinger, S. A. (2013). Avian Vocal Production in Noise. In *Animal*  
570 *Communication and Noise* (2nd ed., Vol. 2, pp. 187–227). Berlin, Heidelberg:  
571 Springer, Berlin, Heidelberg. [http://doi.org/10.1007/978-3-642-41494-7\\_7](http://doi.org/10.1007/978-3-642-41494-7_7)



- 572 Chen, Y., Matheson, L. E., & Sakata, J. T. (2016). Mechanisms underlying the social  
573 enhancement of vocal learning in songbirds. *Proceedings of the National Academy of*  
574 *Sciences*, 113(24), 6641–6646. <http://doi.org/10.1073/pnas.1522306113>
- 575 Cohen, Y., Shen, J., Semu, D., Leman, D. P., Liberti, W. A., Perkins, L. N., et al. (2020).  
576 Hidden neural states underlie canary song syntax. *Nature*, 582(7813), 539–544.  
577 <http://doi.org/10.1038/s41586-020-2397-3>
- 578 Cunningham, H. A., & Welch, R. B. (1994). Multiple concurrent visual-motor mappings:  
579 implications for models of adaptation. *Journal of Experimental Psychology. Human*  
580 *Perception and Performance*, 20(5), 987–999. [http://doi.org/10.1037//0096-](http://doi.org/10.1037//0096-1523.20.5.987)  
581 [1523.20.5.987](http://doi.org/10.1037//0096-1523.20.5.987)
- 582 Cynx, J. (1990). Experimental determination of a unit of song production in the zebra  
583 finch (*Taeniopygia guttata*). *Journal of Comparative Psychology*, 104(1), 3–10.
- 584 Doupe, A. J., & Kuhl, P. K. (1999). Birdsong and human speech: common themes and  
585 mechanisms. *Annual Review of Neuroscience*, 22(1), 567–631.  
586 <http://doi.org/10.1146/annurev.neuro.22.1.567>
- 587 Gadagkar, V., Puzerey, P. A., & Goldberg, J. H. (2019). Dopamine neurons change their  
588 tuning according to courtship context in singing birds. *Biorxiv.org*.  
589 <http://doi.org/https://doi.org/10.1101/822817>
- 590 Güntürkün, O. (2005). The avian “prefrontal cortex” and cognition. *Current Opinion in*  
591 *Neurobiology*, 15(6), 686–693.
- 592 Hage, S. R., & Nieder, A. (2013). Single neurons in monkey prefrontal cortex encode  
593 volitional initiation of vocalizations. *Nature Communications*, 4(1), 2409.  
594 <http://doi.org/10.1038/ncomms3409>
- 595 Hage, S. R., & Nieder, A. (2016). Dual Neural Network Model for the Evolution of Speech  
596 and Language. *Trends in Neurosciences*, 39(12), 813–829.  
597 <http://doi.org/10.1016/j.tins.2016.10.006>
- 598 Hamaguchi, K., Tanaka, M., & Mooney, R. (2016). A Distributed Recurrent Network  
599 Contributes to Temporally Precise Vocalizations. *Neuron*, 91(3), 680–693.  
600 <http://doi.org/10.1016/j.neuron.2016.06.019>
- 601 Hedley, R. W., Denton, K. K., & Weiss, R. E. (2017). Accounting for syntax in analyses of  
602 countersinging reveals hidden vocal dynamics in a songbird with a large repertoire.  
603 *Animal Behaviour*, 131, 23–32. <http://doi.org/10.1016/j.anbehav.2017.06.021>
- 604 Hikosaka, O., Nakahara, H., Rand, M. K., Sakai, K., Lu, X., Nakamura, K., et al. (1999).  
605 Parallel neural networks for learning sequential procedures. *Trends in*  
606 *Neurosciences*, 22(10), 464–471. [http://doi.org/10.1016/S0166-2236\(99\)01439-3](http://doi.org/10.1016/S0166-2236(99)01439-3)
- 607 Hosino, T., & Okanoya, K. (2000). Lesion of a higher-order song nucleus disrupts phrase  
608 level complexity in Bengalese finches. *NeuroReport*, 11(10), 2091–2095.
- 609 Howard, I. S., Wolpert, D. M., & Franklin, D. W. (2013). The effect of contextual cues on  
610 the encoding of motor memories. *Journal of Neurophysiology*, 109(10), 2632–2644.  
611 <http://doi.org/10.1152/jn.00773.2012>
- 612 Imamizu, H., & Kawato, M. (2009). Brain mechanisms for predictive control by switching  
613 internal models: implications for higher-order cognitive functions. *Psychological*  
614 *Research*, 73(4), 527–544. <http://doi.org/10.1007/s00426-009-0235-1>

- 615 Imamizu, H., Sugimoto, N., Osu, R., Tsutsui, K., Sugiyama, K., Wada, Y., & Kawato, M.  
616 (2007). Explicit contextual information selectively contributes to predictive  
617 switching of internal models. *Experimental Brain Research*, 181(3), 395–408.  
618 <http://doi.org/10.1007/s00221-007-0940-1>
- 619 James, L. S., Dai, J. B., & Sakata, J. T. (2018). Ability to modulate birdsong across social  
620 contexts develops without imitative social learning. *Biology Letters*, 14(3),  
621 20170777. <http://doi.org/10.1098/rsbl.2017.0777>
- 622 Jarvis, E. D., Yu, J., Rivas, M. V., Horita, H., Feenders, G., Whitney, O., et al. (2013). Global  
623 view of the functional molecular organization of the avian cerebrum: Mirror images  
624 and functional columns. *The Journal of Comparative Neurology*, 521(16), 3614–3665.  
625 <http://doi.org/10.1002/cne.23404>
- 626 Jin, D. Z. (2009). Generating variable birdsong syllable sequences with branching chain  
627 networks in avian premotor nucleus HVC. *Physical Review. E, Statistical, Nonlinear,*  
628 *and Soft Matter Physics*, 80(5 Pt 1), 051902.  
629 <http://doi.org/10.1103/PhysRevE.80.051902>
- 630 Jin, D. Z., & Kozhevnikov, A. A. (2011). A compact statistical model of the song syntax in  
631 Bengalese finch. *PLoS Computational Biology*, 7(3), e1001108–e1001108.  
632 <http://doi.org/10.1371/journal.pcbi.1001108>
- 633 Jin, X., & Costa, R. M. (2015). Shaping action sequences in basal ganglia circuits. *Current*  
634 *Opinion in Neurobiology*, 33, 188–196. <http://doi.org/10.1016/j.conb.2015.06.011>
- 635 Lee, J.-Y., & Schweighofer, N. (2009). Dual Adaptation Supports a Parallel Architecture of  
636 Motor Memory. *The Journal of Neuroscience*, 29(33), 10396–10404.  
637 <http://doi.org/10.1523/JNEUROSCI.1294-09.2009>
- 638 McDougle, S. D., Ivry, R. B., & Taylor, J. A. (2016). Taking Aim at the Cognitive Side of  
639 Learning in Sensorimotor Adaptation Tasks. *Trends in Cognitive Sciences*, 20(7), 535–  
640 544. <http://doi.org/10.1016/j.tics.2016.05.002>
- 641 Nicholson, A. A. (2016). Comparison of machine learning methods applied to birdsong  
642 element classification. *Proceedings of the 15th Python in Science Conference*.
- 643 Nieder, A., & Mooney, R. (2020). The neurobiology of innate, volitional and learned  
644 vocalizations in mammals and birds. *Philosophical Transactions of the Royal Society*  
645 *B*, 375(1789), 20190054. <http://doi.org/10.1098/rstb.2019.0054>
- 646 Okanoya, K. (2004). The Bengalese finch: a window on the behavioral neurobiology of  
647 birdsong syntax. *Annals of the New York Academy of Sciences*, 1016, 724–735.  
648 <http://doi.org/10.1196/annals.1298.026>
- 649 Reichmuth, C., & Casey, C. (2014). Vocal learning in seals, sea lions, and walruses.  
650 *Current Opinion in Neurobiology*, 28, 66–71.  
651 <http://doi.org/10.1016/j.conb.2014.06.011>
- 652 Sakata, J. T., Hampton, C. M., & Brainard, M. S. (2008). Social Modulation of Sequence and  
653 Syllable Variability in Adult Birdsong. *Journal of Neurophysiology*, 99(4), 1700–1711.  
654 <http://doi.org/10.1152/jn.01296.2007>
- 655 Searcy, W. A., & Beecher, M. D. (2009). Song as an aggressive signal in songbirds. *Animal*  
656 *Behaviour*, 78(6), 1281–1292. <http://doi.org/10.1016/j.anbehav.2009.08.011>
- 657 Seki, Y., Suzuki, K., Takahasi, M., & Okanoya, K. (2008). Song Motor control organizes  
658 acoustic patterns on two levels in Bengalese finches (*Lonchura striata* var.

- 659 domestica). *J Comp Physiol a*, 194(6), 533–543. [http://doi.org/10.1007/s00359-008-](http://doi.org/10.1007/s00359-008-0328-0)  
660 0328-0
- 661 Simonyan, K., & Horwitz, B. (2011). Laryngeal motor cortex and control of speech in  
662 humans. *The Neuroscientist : a Review Journal Bringing Neurobiology, Neurology and*  
663 *Psychiatry*, 17(2), 197–208. <http://doi.org/10.1177/1073858410386727>
- 664 Suzuki, T. N., & Zuberbühler, K. (2019). Animal syntax. *Current Biology*, 29(14), R669–  
665 R671. <http://doi.org/10.1016/j.cub.2019.05.045>
- 666 Suzuki, T. N., Wheatcroft, D., & Griesser, M. (2020). The syntax–semantics interface in  
667 animal vocal communication. *Philosophical Transactions of the Royal Society B*,  
668 375(1789), 20180405. <http://doi.org/10.1098/rstb.2018.0405>
- 669 Tanji, J. (2001). Sequential organization of multiple movements: involvement of cortical  
670 motor areas. *Annual Review of Neuroscience*, 24(1), 631–651.  
671 <http://doi.org/10.1146/annurev.neuro.24.1.631>
- 672 Troyer, T. W., Brainard, M. S., & Bouchard, K. E. (2017). Timing during transitions in  
673 Bengalese finch song: implications for motor sequencing. *Journal of Neurophysiology*,  
674 118(3), 1556–1566. <http://doi.org/10.1152/jn.00296.2017>
- 675 Tumer, E. C., & Brainard, M. S. (2007). Performance variability enables adaptive  
676 plasticity of “crystallized” adult birdsong. *Nature*, 450(7173), 1240–1244.  
677 <http://doi.org/10.1038/nature06390>
- 678 Ullrich, R., Norton, P., & Scharff, C. (2016). Waltzing Taeniopygia: integration of  
679 courtship song and dance in the domesticated Australian zebra finch. *Animal*  
680 *Behaviour*, 112, 285–300. <http://doi.org/10.1016/j.anbehav.2015.11.012>
- 681 Veit, L., & Nieder, A. (2013). Abstract rule neurons in the endbrain support intelligent  
682 behaviour in corvid songbirds. *Nature Communications*, 4:2878.  
683 <http://doi.org/10.1038/ncomms3878>
- 684 Veit, L., Pidpruzhnykova, G., & Nieder, A. (2015). Associative learning rapidly establishes  
685 neuronal representations of upcoming behavioral choices in crows. *Proceedings of*  
686 *the National Academy of Sciences of the United States of America*, 112(49), 15208–  
687 15213. <http://doi.org/10.1073/pnas.1509760112>
- 688 Vignal, C., Mathevon, N., & Mottin, S. (2004). Audience drives male songbird response to  
689 partner's voice. *Nature*, 430(6998), 448–451. <http://doi.org/10.1038/nature02645>
- 690 Vyssotski, A. L., Stepien, A. E., Keller, G. B., & Hahnloser, R. H. R. (2016). A Neural Code  
691 That Is Isometric to Vocal Output and Correlates with Its Sensory Consequences.  
692 *PLoS Biology*, 14(10), e2000317. <http://doi.org/10.1371/journal.pbio.2000317>
- 693 Warren, T. L., Charlesworth, J. D., Tumer, E. C., & Brainard, M. S. (2012). Variable  
694 sequencing is actively maintained in a well learned motor skill. *The Journal of*  
695 *Neuroscience*, 32(44), 15414–15425. [http://doi.org/10.1523/JNEUROSCI.1254-](http://doi.org/10.1523/JNEUROSCI.1254-12.2012)  
696 12.2012
- 697 Wheeler, B. C., & Fischer, J. (2012). Functionally referential signals: a promising  
698 paradigm whose time has passed. *Evolutionary Anthropology*, 21(5), 195–205.  
699 <http://doi.org/10.1002/evan.21319>
- 700 Wild, J. M. (1994). Visual and somatosensory inputs to the avian song system via nucleus  
701 uvaeformis (Uva) and a comparison with the projections of a similar thalamic

- 702 nucleus in a nonsongbird, *Columba livia*. *The Journal of Comparative Neurology*,  
703 349(4), 512–535. <http://doi.org/10.1002/cne.903490403>
- 704 Wolpert, D. M., Diedrichsen, J., & Flanagan, J. R. (2011). Principles of sensorimotor  
705 learning. *Nature Reviews Neuroscience*, 12(12), 739–751.  
706 <http://doi.org/10.1038/nrn3112>
- 707 Zhang, Y. S., Wittenbach, J. D., Jin, D. Z., & Kozhevnikov, A. A. (2017). Temperature  
708 Manipulation in Songbird Brain Implicates the Premotor Nucleus HVC in Birdsong  
709 Syntax. *The Journal of Neuroscience*, 37(10), 2600–2611.  
710 <http://doi.org/10.1523/JNEUROSCI.1827-16.2017>
